# Supplementary material
Source: Springer Nature journal article supplement (https://www.springermedizin.de/resource/supplementary/12955_2003_13_MOESM2_ESM.pdf/9558372)

CCQ Total

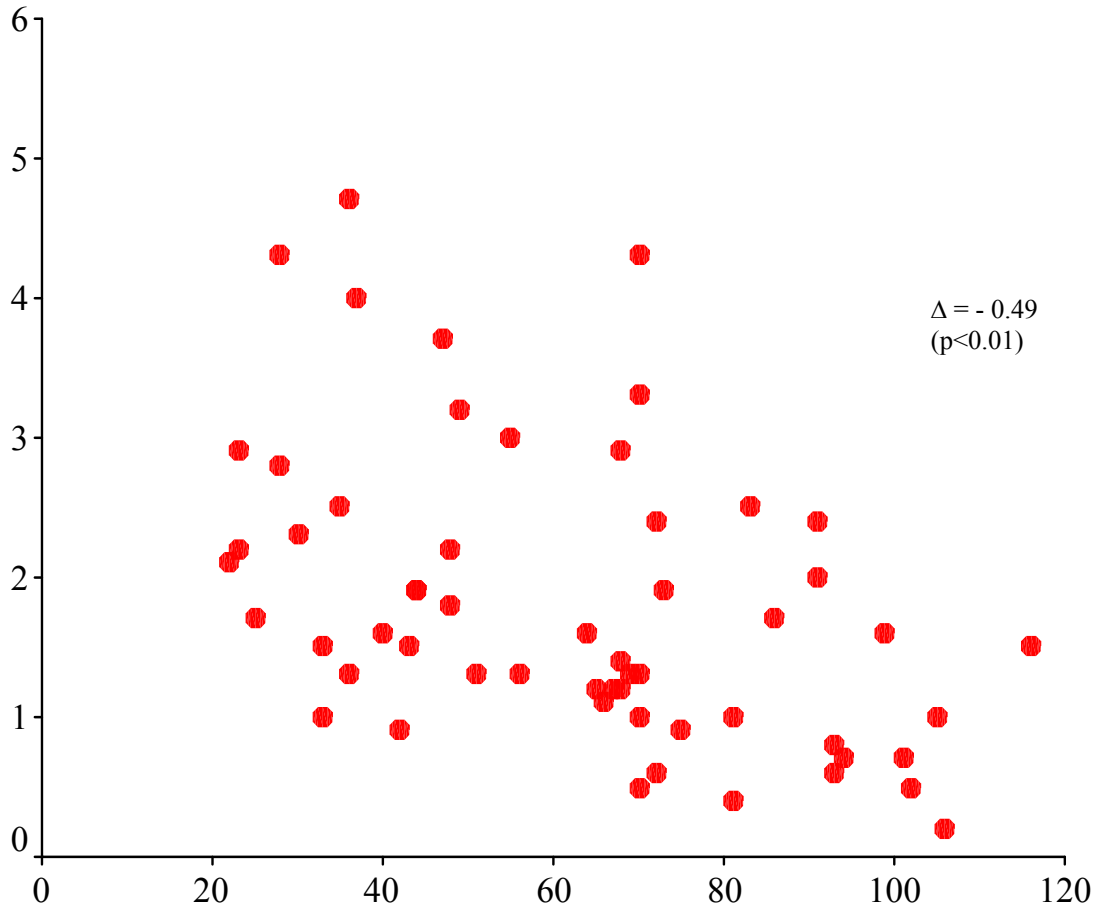

FEV<sub>1</sub> (%predicted)

Supplement: MOESM2 [file 9558372]
